# Supplementary material
Source: HighWire-hosted journal article supplement (https://rapm.bmj.com/highwire/filestream/21713/field_highwire_adjunct_files/7/rapm-2022-104236supp008_data_supplement.pdf)
Supplement: rapm-2022-104236supp008_data_supplement.pdf [file rapm-2022-104236supp008_data_supplement.pdf]

Supplemental Table 8. ICD-10CM Diagnosis and ICD-10-PC and CPT Procedure Codes Used to Identify Comorbidities, Safety Outcomes, and Spine Interventions

|                                                                                               |                                                                                                                                                                 |
|-----------------------------------------------------------------------------------------------|-----------------------------------------------------------------------------------------------------------------------------------------------------------------|
| <b>Comorbidities</b>                                                                          |                                                                                                                                                                 |
| Asthma                                                                                        | ICD-10-CM: J45.20-J45.991                                                                                                                                       |
| Back syndrome                                                                                 | ICD-10-CM: M96.1                                                                                                                                                |
| Chronic obstructive pulmonary disease                                                         | ICD-10-CM: J44.0, J44.1, J44.9                                                                                                                                  |
| Diabetes                                                                                      | ICD-10-CM: E10.10-E13.9                                                                                                                                         |
| Diabetic neuropathy                                                                           | ICD-10-CM: E08.21, E08.40-E08.49, E09.21, E09.21, E09.40-E09.43, E09.610, E10.40-E10.44, E10.610, E11.40-E11.44, E13.40-E13.44, E13.610, G90.09                 |
| Intervertebral disc disorders                                                                 | ICD-10-CM: M51.04- M51.06, M51.34-M51.37                                                                                                                        |
| Heart failure                                                                                 | ICD-10-CM: I50.1-I50.9, I11.0, I09.81                                                                                                                           |
| Hypertension                                                                                  | ICD-10-CM: I10                                                                                                                                                  |
| Obesity                                                                                       | ICD-10-CM: E66.01-E66.09, E66.2-E66.9                                                                                                                           |
| Osteoarthritis                                                                                | ICD-10-CM: M15.0-M15.9, M16.1, M16.0, M17.10-M17.5, M19.01-M19.93                                                                                               |
| Osteoporosis                                                                                  | ICD-10-CM: M81.0, M81.6, M81.8, M80.00XA, M80.0AXA, M80.8AXA, M80.80XA, M80.08XA, M80.08XD, M80.08XG, M80.08XS, M80.88XA, M80.88XD, M80.88XG, M80.88XS          |
| Closed or pathological hip fracture                                                           | ICD-10-CM: M84.559, M84.659, M97.01, M97.02, M48.50XA-M48.50XS, M48.56XA-M48.56XS, M48.57XA-M48.57XS, M48.58XA-M48.58XS                                         |
| Lumbar spondylolisthesis                                                                      | ICD-10-CM: M43.16                                                                                                                                               |
| Spondylolisthesis, other than lumbar                                                          | ICD-10-CM: M43.10-M43.15, M43.17-M43.19, S12.13-S12.64                                                                                                          |
| Vascular claudication                                                                         | ICD-10-CM: I70.201-I70.228                                                                                                                                      |
| <b>Post-operative complication</b>                                                            |                                                                                                                                                                 |
| Mechanical complications due to displacement, breakdown or unspecified complication of device | ICD-10-CM: T85.625A, T85.625D, T85.625S, T85.628A, T85.628D, T85.628S, T85.615A, T85.615D, T85.615S, T85.618A, T85.618D, T85.618S, T85.9XXA, T85.9XXD, T85.9XXS |
| Spinous process fracture                                                                      | ICD-10-CM: S32.009A, S32.019A, S32.029A, S32.039A, S32.049A, S32.059A, M48.56XA, M48.57XA                                                                       |
| Allergic reaction to device implant                                                           | ICD-10-CM: T88.6XXA-T88.6XXS, Y83.1                                                                                                                             |
| Infection/inflammation due to device                                                          | ICD-10-CM: T85.733A, T85.733D, T85.733S, T85.734A, T85.734D, T85.734S, T85.738A, T85.738D, T85.738S, T85.79XA, T85.79XD, T85.79XS                               |
| Lumbosacral spinal cord injury                                                                | ICD-10-CM: S34.101A-S34.109S, S34.4XXA-S34.5XXD                                                                                                                 |

|                                                           |                                                                                                                                                                                   |
|-----------------------------------------------------------|-----------------------------------------------------------------------------------------------------------------------------------------------------------------------------------|
| Nerve root injury                                         | ICD-10-CM: S24.2XXA-S24.2XXS, S24.9XXA-S24.9XXS, S34.21XA-S34.22XS, S14.2XXA-S17.2XXS                                                                                             |
| Cerebrospinal fluid leaks                                 | ICD-10-CM: G96.00-G96.09                                                                                                                                                          |
| Wound infections                                          | ICD-10-CM: O86.00-O86.09                                                                                                                                                          |
| Wound dehiscence                                          | ICD-10-CM: T81.30XA, T81.30XD, T81.30XS, T81.32XA, T81.32XD, T81.32XS, T81.33XA, T81.33XD, T81.33XD, T81.33XA, T81.33XD, T81.33XS                                                 |
| Hematomas                                                 | ICD-10-CM: O71.7, O90.2, M79.81, N83.7, L76.32                                                                                                                                    |
| Thrombophlebitis                                          | ICD-10-CM: I80.00-I80.9                                                                                                                                                           |
|                                                           |                                                                                                                                                                                   |
| <b>Life Threatening Complication</b>                      |                                                                                                                                                                                   |
| Acute myocardial infarction                               | ICD-10-CM: I21.01-I21.A9                                                                                                                                                          |
| Cardiac arrest                                            | ICD-10-CM: I46.2, I46.8, I46.9                                                                                                                                                    |
| Deep venous thrombosis                                    | ICD-10-CM: I82.401, I82.402, I82.403, I82.421, I82.422, I82.442, I82.449, I82.621, I82.622                                                                                        |
| Ischemic Stroke                                           | ICD-10-CM: I63.00-I63.9                                                                                                                                                           |
| Pneumonia                                                 | ICD-10-CM: J15.0, J15.20, J15.29, J15.7                                                                                                                                           |
| Pulmonary embolism                                        | ICD-10-CM: I26.01-I26.99, I27.81-I27.89                                                                                                                                           |
| Sepsis                                                    | ICD-10-CM: R65.20, R65.21                                                                                                                                                         |
| <b>Subsequent Surgeries - LSS Surgical Intervention</b>   |                                                                                                                                                                                   |
| Interspinous spacer without decompression or fusion       | CPT: 22869, 22870<br>ICD-10-PCS: 0SH00BZ                                                                                                                                          |
| MILD                                                      | CPT: 0275T<br>ICD-10-PCS: 00NY3ZZ                                                                                                                                                 |
| Open decompression                                        | CPT: 63005, 63017, 63030, 63035, 63042-63048, 63052, 63053<br>ICD-10-PCS: 00NY0ZZ, 01NB0ZZ                                                                                        |
| Fusion                                                    | CPT: 22558, 22585, 22612, 22614, 22630-22634<br>ICD-10-PCS: 0SG0070-0SG00KJ, 0SG0370-0SG03KJ, 0SG0470-0SG04KJ, 0SG1070-0SG10KJ, 0SG1370-0SG13KJ, 0SG3070-0SG30KJ, 0SG3370-0SG33KJ |
| Interspinous spacer with decompression                    | CPT: 22867, 22868<br>ICD-10-PCS: (0SB00ZZ, 0SB20ZZ, or 0NY00ZZ) + 0SH00BZ                                                                                                         |
| <b>Subsequent Surgeries - Other Surgical Intervention</b> |                                                                                                                                                                                   |
| Spinal cord stimulation                                   | CPT: 63685, 63650, 63655<br>ICD-10-PCS: 00HU0MZ, 00HU3MZ, 00HV0MZ, 00HV3MZ, 0JH70BZ, 0JH70CZ, 0JH70DZ, 0JH70EZ, 0JH80BZ, 0JH80CZ, 0JH80DZ, 0JH80EZ                                |

|                                                                             |                                                                                                                                                                                      |
|-----------------------------------------------------------------------------|--------------------------------------------------------------------------------------------------------------------------------------------------------------------------------------|
| Procedural removal of an implant in the spine region                        | CPT: 22899                                                                                                                                                                           |
| Disc procedure                                                              | CPT: 22857, 22858, 22862, 22865<br>ICD-10-PCS: 0RR50JZ, 0SR20JZ, 0SR40JZ, 0RW50JZ, 0SP20JZ, 0SP40JZ                                                                                  |
| Drug delivery implant                                                       | CPT: 20702, 20703, 11981-11983, 96522, 96523, 95990, 95991<br>ICD-10-PCS: 0JHT03Z, 0JHV03Z, 0JHW03Z, 0JPT03Z, 0JPV03Z, 0JPW03Z, 0JWT3VZ, 0JWV3VZ, 0JWW3VZ, 3C1ZX8Z, 00WU33Z, 00WV33Z |
| Endoscopic decompression                                                    | CPT: 62380<br>ICD-10-PCS: 00NY4ZZ, 01NB4ZZ                                                                                                                                           |
| Repair of dural or cerebrospinal fluid leak                                 | CPT: 62100, 63707, 63709<br>ICD-10-PCS: 00U107Z, 00U10JZ, 00U10KZ, 00U207Z, 00U20KZ, 0JB00ZZ, 00Q20ZZ                                                                                |
| Vertebral excision                                                          | CPT: 63301-63308<br>ICD-10-PCS: 00B20ZZ, 00BX0ZZ, 00BY0ZZ                                                                                                                            |
| Other lumbar spine surgeries (e.g. discectomy, vertebroplasty, kyphoplasty) | CPT: 63076-63078, 22510-22512, 22513-22515<br>ICD-10-PCS: 00NX0ZZ, 01N80ZZ, 0PU437Z, 0PU43JZ, 0PU43KZ, 0QU037Z, 0QU03JZ, 0QU03KZ, 0QU137Z, 0QU13JZ, 0QU13KZ, 0PU43JZ, 0QU03JZ        |

ISD, interspinous spacer; LSS, lumbar spinal stenosis; MILD, minimally invasive lumbar decompression;
